# Supplementary material
Source: PubMed Central journal article supplement (PMC9910104)
Supplement: Supp_TableS1.pdf [file Supp_TableS1.pdf]

**Supplemental Table 1.** Plasma tenofovir (TFV) pharmacokinetics

|                                         | <b>C<sub>tau</sub></b><br><b>(ng/mL)</b> | <b>C<sub>max</sub></b><br><b>(ng/mL)</b> | <b>T<sub>max</sub></b><br><b>(hrs)</b> | <b>AUC<sub>tau</sub></b><br><b>(ng*hr/mL)</b> | <b>T<sub>1/2</sub></b><br><b>(hrs)</b> |
|-----------------------------------------|------------------------------------------|------------------------------------------|----------------------------------------|-----------------------------------------------|----------------------------------------|
| <b>OVERALL</b>                          | <b>58.7</b><br><b>(52.8, 65.3)</b>       | <b>304.4</b><br><b>(276.4, 335.3)</b>    | <b>1.2</b><br><b>(1.1, 1.3)</b>        | <b>2740</b><br><b>(2503, 2999)</b>            | <b>15.9</b><br><b>(15.0, 17.0)</b>     |
| Transgender women (N=26)                | 56.3<br>(47.0, 67.3)                     | 313.7<br>(278.6, 353.1)                  | 1.2<br>(1.0, 1.4)                      | 2660<br>(2314, 3057)                          | 16.0<br>(14.3, 17.9)                   |
| Transgender men (N=24)                  | 61.5<br>(54.8, 69.1)                     | 294.7<br>(250.1, 347.4)                  | 1.2<br>(1.0, 1.4)                      | 2829<br>(2502, 3199)                          | 15.9<br>(14.9, 16.9)                   |
| TM vs. TW,<br>GMR (95% CI)              | 1.09<br>(0.88, 1.35)                     | 0.93<br>(0.77, 1.14)                     | 1.03<br>(0.84, 1.28)                   | 1.06<br>(0.89, 1.28)                          | 0.99<br>(0.88, 1.13)                   |
| P-value                                 | 0.401                                    | 0.524                                    | 0.750                                  | 0.499                                         | 0.931                                  |
| <b><i>HISTORICAL CONTROLS</i></b>       |                                          |                                          |                                        |                                               |                                        |
| Hiransuthikal, et al.<br>GM (CV%)       | 59.8<br>(29.6)                           | 311.4<br>(30.0)                          | -                                      | 2530<br>(31.3)                                | -                                      |
| Shieh, et al.<br>Median (IQR)           | 60<br>(55, 76)                           | 349<br>(269, 398)                        | -                                      | 3431<br>(2720, 3649)                          | -                                      |
| Cirincione, et al.<br>GM (90% CI)       | -                                        | 280<br>(260, 310)                        | 2.2<br>(1.8, 2.8)                      | 2760<br>(2570, 2960)                          | 15.5<br>(12.9, 18.6)                   |
| Cell-PrEP <sup>a</sup><br>Mean (95% CI) | -                                        | -                                        | -                                      | 2424<br>(2112, 2736)                          | 19.0<br>(15, 22)                       |

All values expressed as geometric mean (95% CI), unless otherwise stated. <sup>a</sup> AUC calculated as C<sub>ss</sub>\*24 hrs.
