# Supplementary material
Source: PubMed Central journal article supplement (PMC9910104)
Supplement: Supp_TableS2.pdf [file Supp_TableS2.pdf]

**Supplemental Table 2.** TFV plasma pharmacokinetic parameter estimates within groups, by route of hormone administration and spironolactone use

|                                                          | <b>C<sub>tau</sub></b><br><b>(ng/mL)</b> | <b>C<sub>max</sub></b><br><b>(ng/mL)</b> | <b>T<sub>max</sub></b><br><b>(hrs)</b> | <b>AUC<sub>tau</sub></b><br><b>(ng*hr/mL)</b> | <b>T<sub>1/2</sub></b><br><b>(hrs)</b> |
|----------------------------------------------------------|------------------------------------------|------------------------------------------|----------------------------------------|-----------------------------------------------|----------------------------------------|
| <b>ROUTE OF ESTRADIOL ADMINISTRATION IN TW (N=26)</b>    |                                          |                                          |                                        |                                               |                                        |
| PO/SL                                                    | 52.9<br>(38.0, 73.6)                     | 327<br>(266, 404)                        | 1.11<br>(0.96, 1.28)                   | 2530<br>(1962, 3263)                          | 16.7<br>(13.6, 20.5)                   |
| IM                                                       | 60.5<br>(52.5, 69.7)                     | 298<br>(265, 336)                        | 1.26<br>(0.95, 1.68)                   | 2820<br>(2511, 3166)                          | 15.2<br>(14.1, 16.3)                   |
| PO/SL vs. IM,<br>GMR (95% CI)                            | 0.87<br>(0.61, 1.26)                     | 1.10<br>(0.86, 1.39)                     | 0.88<br>(0.66, 1.17)                   | 0.90<br>(0.68, 1.19)                          | 1.10<br>(0.88, 1.38)                   |
| P-value                                                  | 0.450                                    | 0.431                                    | 0.360                                  | 0.435                                         | 0.371                                  |
| <b>ROUTE OF TESTOSTERONE ADMINISTRATION IN TM (N=24)</b> |                                          |                                          |                                        |                                               |                                        |
| SQ                                                       | 62.6<br>(50.7, 77.2)                     | 280<br>(207, 380)                        | 1.18<br>(0.89, 1.56)                   | 2881<br>(2320, 3577)                          | 15.5<br>(14.0, 17.2)                   |
| IM                                                       | 60.5<br>(52.6, 69.6)                     | 310<br>(259, 372)                        | 1.26<br>(1.02, 1.57)                   | 2778<br>(2376, 3247)                          | 16.3<br>(15.0, 17.7)                   |
| SQ vs. IM,<br>GMR (95% CI)                               | 1.03<br>(0.82, 1.31)                     | 0.90<br>(0.65, 1.26)                     | 0.93<br>(0.67, 1.30)                   | 1.04<br>(0.81, 1.34)                          | 0.95<br>(0.84, 1.08)                   |
| P-value                                                  | 0.772                                    | 0.536                                    | 0.659                                  | 0.767                                         | 0.405                                  |
| <b>SPIRONOLACTONE USE IN TW (N=26)</b>                   |                                          |                                          |                                        |                                               |                                        |
| Spironolactone                                           | 48.5<br>(30.9, 76.3)                     | 275<br>(208, 363)                        | 1.30<br>(0.96, 1.75)                   | 2361<br>(1613, 3455)                          | 14.4<br>(12.6, 16.3)                   |
| No spironolactone                                        | 60.1<br>(49.4, 73.0)                     | 333<br>(292, 379)                        | 1.13<br>(0.95, 1.35)                   | 2804<br>(2438, 3226)                          | 16.8<br>(14.4, 19.5)                   |
| Use vs. no use,<br>GMR (95% CI)                          | 0.81<br>(0.55, 1.19)                     | 0.83<br>(0.64, 1.06)                     | 1.15<br>(0.84, 1.57)                   | 0.84<br>(0.62, 1.14)                          | 0.86<br>(0.68, 1.08)                   |
| P-value                                                  | 0.266                                    | 0.125                                    | 0.375                                  | 0.247                                         | 0.185                                  |
