# Supplementary material
Source: PubMed Central journal article supplement (PMC9910104)
Supplement: Supp_TableS3.pdf [file Supp_TableS3.pdf]

**Supplemental Table 3.** Plasma emtricitabine (FTC) pharmacokinetics

|                                         | <b>C<sub>tau</sub></b><br><b>(ng/mL)</b> | <b>C<sub>max</sub></b><br><b>(ng/mL)</b> | <b>T<sub>max</sub></b><br><b>(hrs)</b> | <b>AUC<sub>tau</sub></b><br><b>(ng*hr/mL)</b> | <b>T<sub>1/2</sub></b><br><b>(hrs)</b> |
|-----------------------------------------|------------------------------------------|------------------------------------------|----------------------------------------|-----------------------------------------------|----------------------------------------|
| <b>OVERALL</b>                          | <b>92.1</b><br><b>(83.1, 102.1)</b>      | <b>1924</b><br><b>(1748, 2118)</b>       | <b>1.6</b><br><b>(1.4, 1.8)</b>        | <b>12,150</b><br><b>(11,344, 13,012)</b>      | <b>6.6</b><br><b>(6.2, 7.0)</b>        |
| Transgender women (N=26)                | 86.9<br>(73.7, 102.5)                    | 1729<br>(1530, 1954)                     | 1.6<br>(1.3, 2.0)                      | 11,071<br>(10,019, 12,233)                    | 6.7<br>(6.0, 7.5)                      |
| Transgender men (N=24)                  | 98.1<br>(86.4, 111.4)                    | 2161<br>(1870, 2497)                     | 1.6<br>(1.4, 1.8)                      | 13,437<br>(12,385, 14,579)                    | 6.4<br>(6.0, 6.8)                      |
| TM vs. TW,<br>GMR (95% CI)              | 1.13<br>(0.92, 1.39)                     | 1.25<br>(1.04, 1.50)                     | 0.98<br>(0.76, 1.25)                   | 1.21<br>(1.07, 1.38)                          | 0.95<br>(0.83, 1.09)                   |
| P-value                                 | 0.242                                    | 0.019                                    | 0.867                                  | 0.004                                         | 0.424                                  |
| <b>HISTORICAL CONTROLS</b>              |                                          |                                          |                                        |                                               |                                        |
| Shieh, et al.<br>Median (IQR)           | 88<br>(64, 102)                          | 2284<br>(1415, 2889)                     | -                                      | 12,698<br>(11,114, 13,683)                    | -                                      |
| Cirincione, et al.<br>GM (90% CI)       | -                                        | 1660<br>(1550, 1790)                     | 2.9<br>(2.4, 3.6)                      | 10,640<br>(10,180, 11,110)                    | 10.6<br>(10.1, 11.0)                   |
| Cell-PrEP <sup>a</sup><br>Mean (95% CI) | -                                        | -                                        | -                                      | 10,344<br>(9216, 11,472)                      | 11.0<br>(7.7, 14)                      |

All values expressed as geometric mean (95% CI), unless otherwise stated. <sup>a</sup> AUC calculated as C<sub>ss</sub>\*24 hrs.
