# Supplementary material
Source: PubMed Central journal article supplement (PMC9910104)
Supplement: Supp_TableS4.pdf [file Supp_TableS4.pdf]

**Supplemental Table 4.** FTC plasma pharmacokinetic parameter estimates within groups, by route of hormone administration and spironolactone use

|                                                          | <b>C<sub>tau</sub></b><br><b>(ng/mL)</b> | <b>C<sub>max</sub></b><br><b>(ng/mL)</b> | <b>T<sub>max</sub></b><br><b>(hrs)</b> | <b>AUC<sub>tau</sub></b><br><b>(ng*hr/mL)</b> | <b>T<sub>1/2</sub></b><br><b>(hrs)</b> |
|----------------------------------------------------------|------------------------------------------|------------------------------------------|----------------------------------------|-----------------------------------------------|----------------------------------------|
| <b>ROUTE OF ESTRADIOL ADMINISTRATION IN TW (N=26)</b>    |                                          |                                          |                                        |                                               |                                        |
| PO/SL                                                    | 90.2<br>(67.6, 120)                      | 1835<br>(1481, 2274)                     | 1.49<br>(1.10, 2.02)                   | 11,456<br>(9658, 13,590)                      | 6.90<br>(5.62, 8.47)                   |
| IM                                                       | 83.2<br>(69.4, 99.6)                     | 1613<br>(1433, 1816)                     | 1.78<br>(1.30, 2.44)                   | 10,637<br>(9491, 11,921)                      | 6.54<br>(5.91, 7.23)                   |
| PO/SL vs. IM,<br>GMR (95% CI)                            | 1.09<br>(0.77, 1.52)                     | 1.14<br>(0.89, 1.45)                     | 0.84<br>(0.55, 1.27)                   | 1.08<br>(0.88, 1.32)                          | 1.06<br>(0.84, 1.33)                   |
| P-value                                                  | 0.622                                    | 0.288                                    | 0.384                                  | 0.457                                         | 0.635                                  |
| <b>ROUTE OF TESTOSTERONE ADMINISTRATION IN TM (N=24)</b> |                                          |                                          |                                        |                                               |                                        |
| SQ                                                       | 104<br>(87.0, 123)                       | 2244<br>(1740, 2894)                     | 1.49<br>(1.19, 1.87)                   | 14,059<br>(12,084, 16,357)                    | 6.45<br>(5.83, 7.13)                   |
| IM                                                       | 93.0<br>(75.4, 115)                      | 2081<br>(1737, 2493)                     | 1.69<br>(1.38, 2.06)                   | 12,843<br>(11,828, 13,945)                    | 6.33<br>(5.73, 7.01)                   |
| SQ vs. IM,<br>GMR (95% CI)                               | 1.11<br>(0.86, 1.44)                     | 1.08<br>(0.80, 1.45)                     | 0.88<br>(0.66, 1.17)                   | 1.09<br>(0.93, 1.29)                          | 1.02<br>(0.89, 1.16)                   |
| P-value                                                  | 0.395                                    | 0.601                                    | 0.377                                  | 0.260                                         | 0.790                                  |
| <b>SPIRONOLACTONE USE IN TW (N=26)</b>                   |                                          |                                          |                                        |                                               |                                        |
| No Spironolactone                                        | 71.9<br>(54.4, 95.0)                     | 1585<br>(1308, 1921)                     | 2.0<br>(1.17, 3.42)                    | 9830<br>(8177, 11,816)                        | 6.35<br>(5.46, 7.38)                   |
| Spironolactone                                           | 94.5<br>(76.7, 116)                      | 1797<br>(1527, 2116)                     | 1.47<br>(1.19, 1.82)                   | 11,672<br>(10,330, 13,187)                    | 6.91<br>(5.91, 8.07)                   |
| Use vs. No Use,<br>GMR (95% CI)                          | 1.32<br>(0.93, 1.85)                     | 1.14<br>(0.87, 1.47)                     | 0.74<br>(0.48, 1.14)                   | 1.19<br>(0.96, 1.47)                          | 1.09<br>(0.85, 1.39)                   |
| P                                                        | 0.118                                    | 0.339                                    | 0.161                                  | 0.103                                         | 0.490                                  |
