# Supplementary material
Source: PubMed Central journal article supplement (PMC9910104)
Supplement: Supp_TableS5.pdf [file Supp_TableS5.pdf]

**Supplemental Table 5.** PBMC concentrations of TFV-DP and FTC-TP

|                                   | <b>TFV-DP<br/>(fmol/10<sup>6</sup> cells)</b>                    | <b>FTC-TP<br/>(pmol/10<sup>6</sup> cells)</b>                               |
|-----------------------------------|------------------------------------------------------------------|-----------------------------------------------------------------------------|
| <b>OVERALL</b>                    | <b>63.7 (54.9, 73.9)</b>                                         | <b>5.05 (4.45, 5.73)</b>                                                    |
| Transgender women (N=26)          | 54.9 (43.5, 69.1)                                                | 4.22 (3.53, 5.05)                                                           |
| Transgender men (N=24)            | 74.9 (62.9, 89.1)                                                | 6.13 (5.26, 7.16)                                                           |
| TM vs. TW,<br>GMR (95% CI)        | 1.37<br>(1.03, 1.82)                                             | 1.45<br>(1.15, 1.83)                                                        |
| P                                 | 0.034                                                            | 0.002                                                                       |
| <b><i>HISTORICAL CONTROLS</i></b> |                                                                  |                                                                             |
| Cell-PrEP<br>Mean (95% CI)        | 95 (85, 106)                                                     | 5.7 (5.2, 6.1)                                                              |
| Hendrix, et al.<br>Median (range) | 36.3 (29.0, 38.5)                                                | 2.2 (1.5, 2.6)                                                              |
| Shieh, et al<br>Median (IQR)      | C <sub>max</sub> : 83 (67, 118)<br>C <sub>24</sub> : 56 (34, 82) | C <sub>max</sub> : 10.9 (8.70, 22.4)<br>C <sub>24</sub> : 4.48 (2.66, 6.82) |

All values are expressed as geometric mean (95% confidence interval) unless otherwise stated
