# Supplementary material
Source: PubMed Central journal article supplement (PMC9910104)
Supplement: Supp_TableS6.pdf [file Supp_TableS6.pdf]

**Supplemental Table 6.** Concentrations of TFV-DP and FTC-TP in DBS at week 4

|                                   | <b>TFV-DP<br/>(fmol/punch)</b> | <b>FTC-TP<br/>(pmol/punch)</b> |
|-----------------------------------|--------------------------------|--------------------------------|
| <b>OVERALL</b>                    | <b>1317 (1180, 1470)</b>       | <b>0.38 (0.32, 0.45)</b>       |
| Transgender women (N=24)          | 1170 (1010, 1355)              | 0.32 (0.25, 0.42)              |
| Transgender men (N=24)            | 1483 (1265, 1740)              | 0.45 (0.35, 0.56)              |
| TM vs. TW,<br>GMR (95% CI)        | 1.27<br>(1.03, 1.57)           | 1.38<br>(0.99, 1.93)           |
| P                                 | 0.028                          | 0.061                          |
| <b><i>HISTORICAL CONTROLS</i></b> |                                |                                |
| DOT-DBS Overall                   | 1247 (1133, 1372)              | 0.31 (0.28, 0.33)              |
| DOT-DBS Cisgender Men<br>(N=15)   | 1145 (990, 1325)               | 0.29 (0.26, 0.33)              |
| DOT-DBS Cisgender Women<br>(N=17) | 1345 (1182, 1529)              | 0.32 (0.28, 0.37)              |

All values are expressed as geometric mean (95% confidence interval).
